# Supplementary material for: HnRNP A1 phosphorylated by VRK1 stimulates telomerase and its binding to telomeric DNA sequence
Source: PubMed Central journal article supplement — Nucleic Acids Res. 2012 Jun 26;40(17):8499–518. doi: 10.1093/nar/gks634 (PMC3458570; doi:10.1093/nar/gks634), 2012-06-26
Supplement: supp_gks634_nar-03111-x-2011-File003.pdf [file supp_gks634_nar-03111-x-2011-File003.pdf]

## Supplementary figure 1

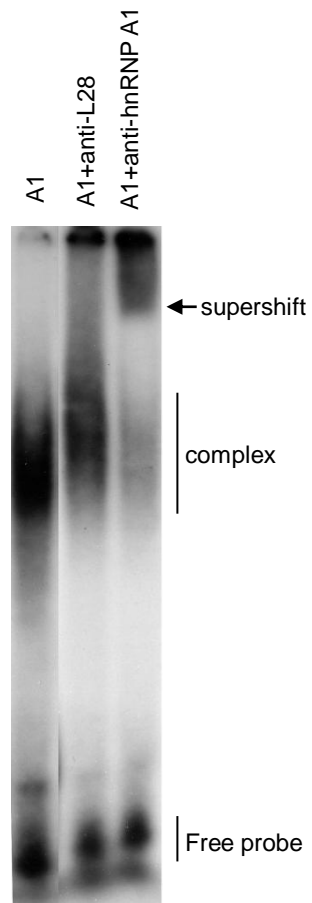

**Supplementary Figure 1. Identification of the complex of hnRNP A1 and Telo7 using antibodies.** 1 $\mu$ g of hnRNP A1 was incubated with  $^{32}$ P-Telo 7 for each reaction. The complex of hnRNP A1-Telo7 was confirmed with anti-hnRNP A1 antibody or nonspecific antibody (RPL28 antibody).

## Supplementary figure 2

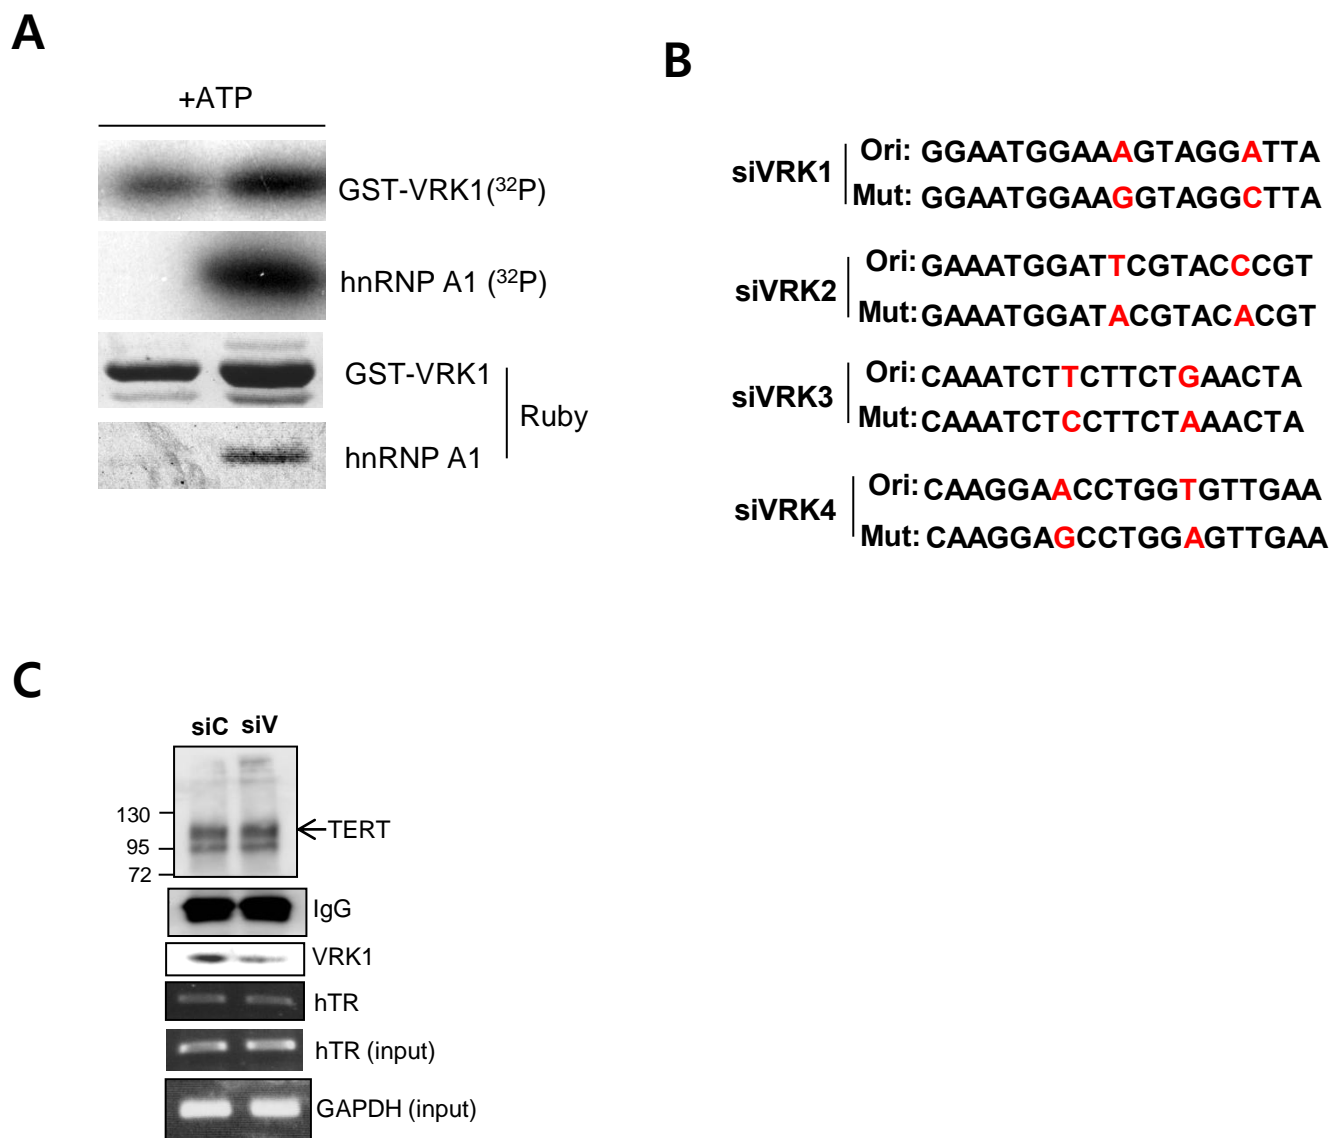

**Supplementary Figure 2.** (A) To confirm the phosphorylation of hnRNP A1, hnRNP A1 was incubated in the kinase reaction condition with <sup>32</sup>P-ATP, which was performed simultaneously with the kinase reaction for EMSA using cold ATP. (B) For the rescue experiment, site-directed mutagenesis with two sites of silent mutation in siVRK1 targeting sequence of VRK1 gene were generated. (C) Telomerase complex was immunoprecipitated with TERT antibody from Control or VRK1-depleted cell lysates. Telomerase RNA (TR) was identified with semi-quantitative PCR (see Materials and Methods). GAPDH gene was amplified and loaded for the control.

## Supplementary figure 3

### A

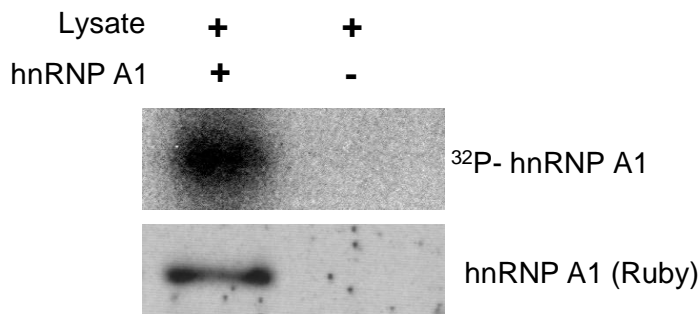

### B

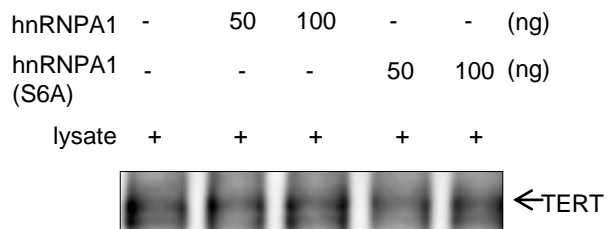

### C

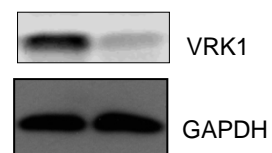

**Supplementary Figure 3.** (A) 0.5 $\mu$ g of hnRNP A1 was incubated with hnRNP A1-depleted cell lysate in a telomerase activity assay condition. hnRNP A1 was labeled with <sup>32</sup>P represented by autoradiography. The bottom panel shows hnRNP A1 stained by SYPRO<sup>®</sup> Ruby protein gel staining solution. (B) TERT was quantified in each reaction of telomerase activity assay (C) For the T-OLA experiment, knock-down of VRK1 was confirmed by Western blot.

## Supplementary figure 4

### A

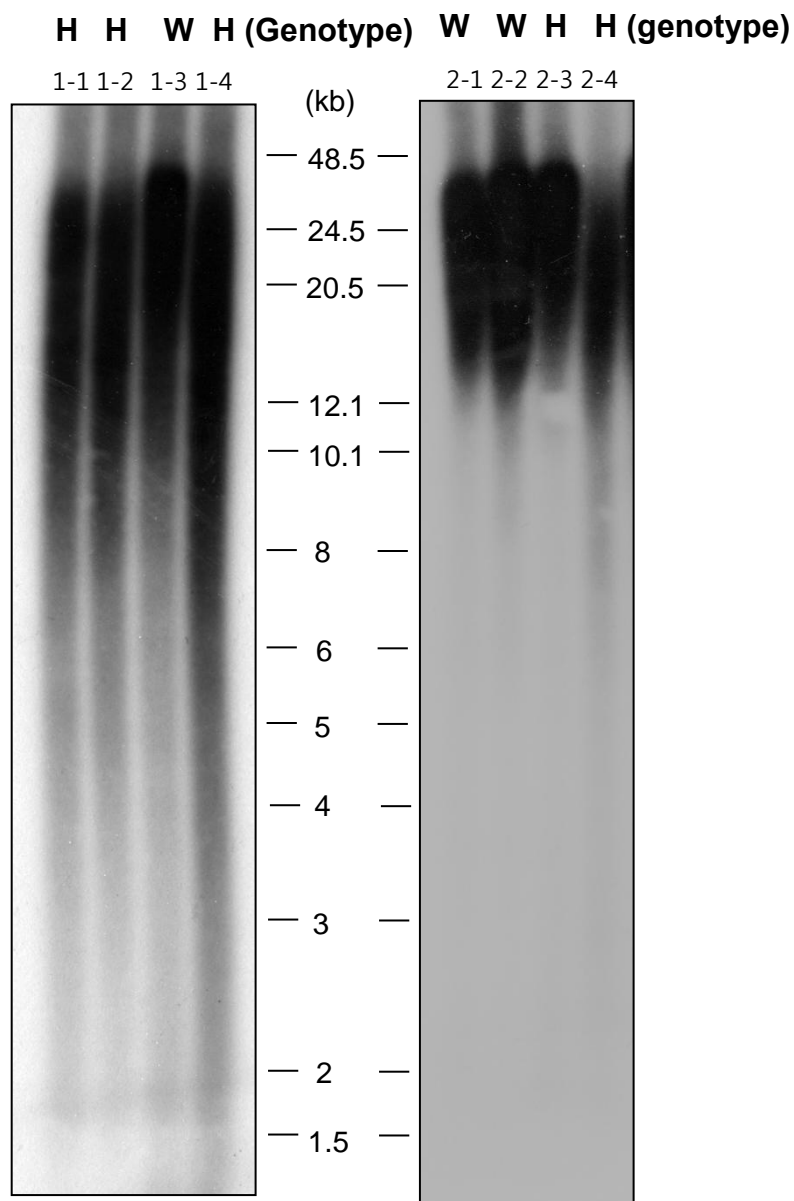

**Supplementary Figure 4.** gDNA of WT (n=3) and VRK1-deficient testes (n=5) were analyzed by TRF assay. Each panels show results of TRF assay from individual litters.

## Supplementary figure 4

**B**

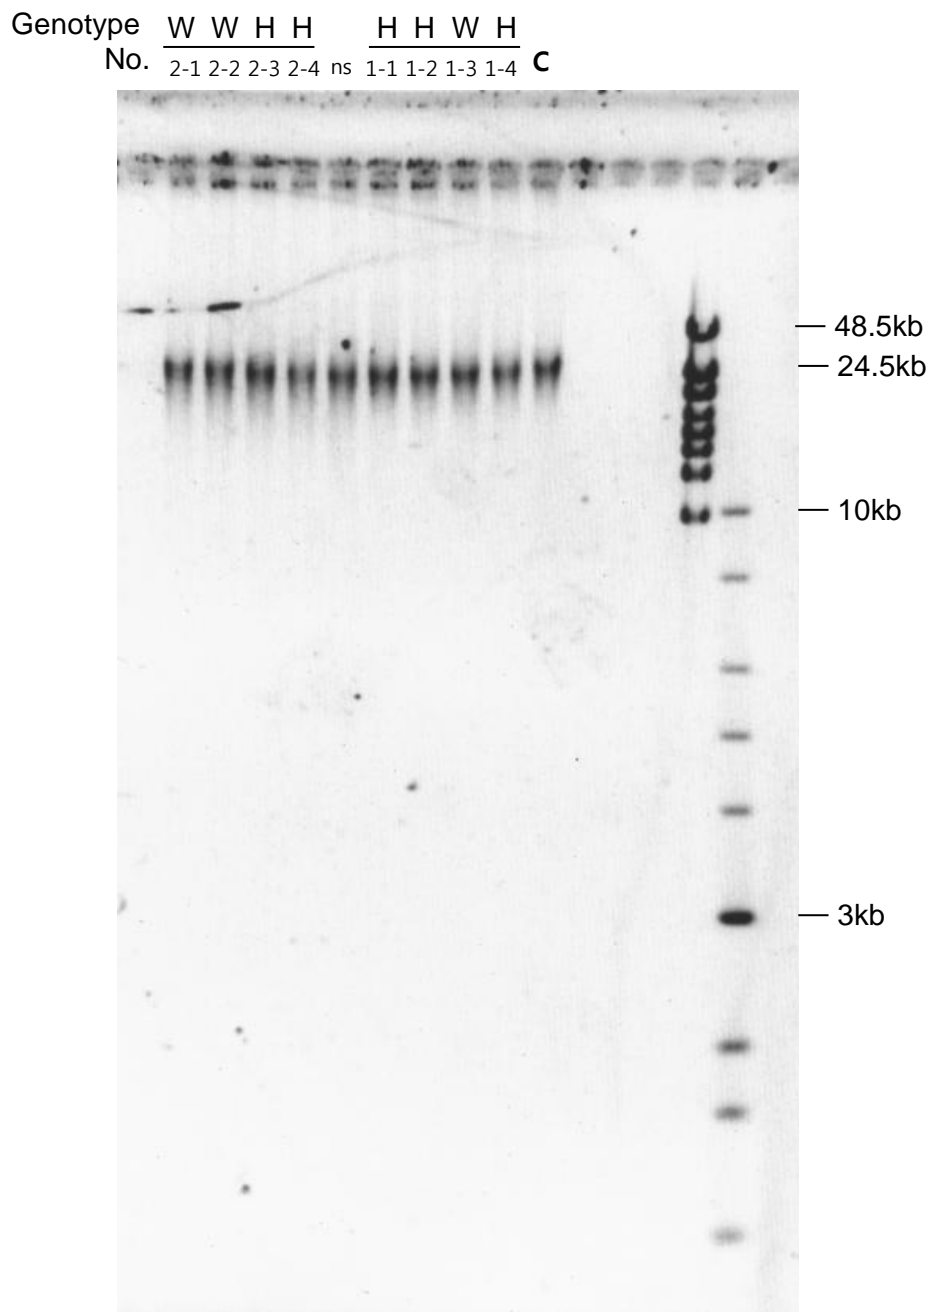

**Supplementary Figure 4. Evaluation of DNA integrity.** Genomic DNA samples (100ng) were resolved on a 0.7 % agarose gel at 25V for 17hrs. Genomic DNA from wild type C57BL/6 mouse (C; control) was loaded as a control. Genomic DNA samples used in TRF assay are intact appearing as single compact crowns. (ns. Non-specific)

# Supplementary figure 5

## A

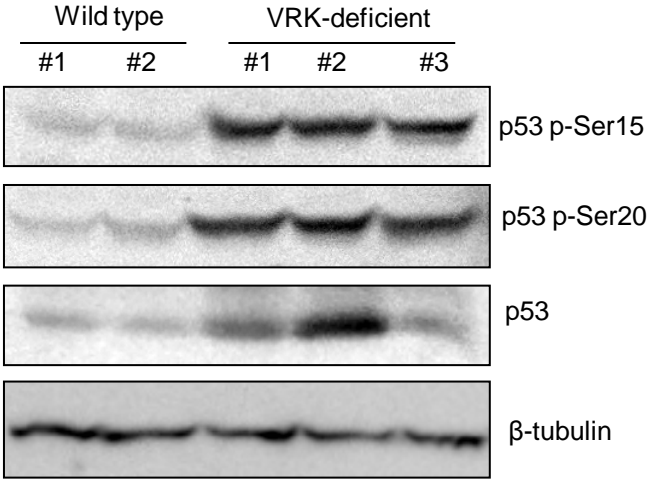

## B

### Testis (16wks)

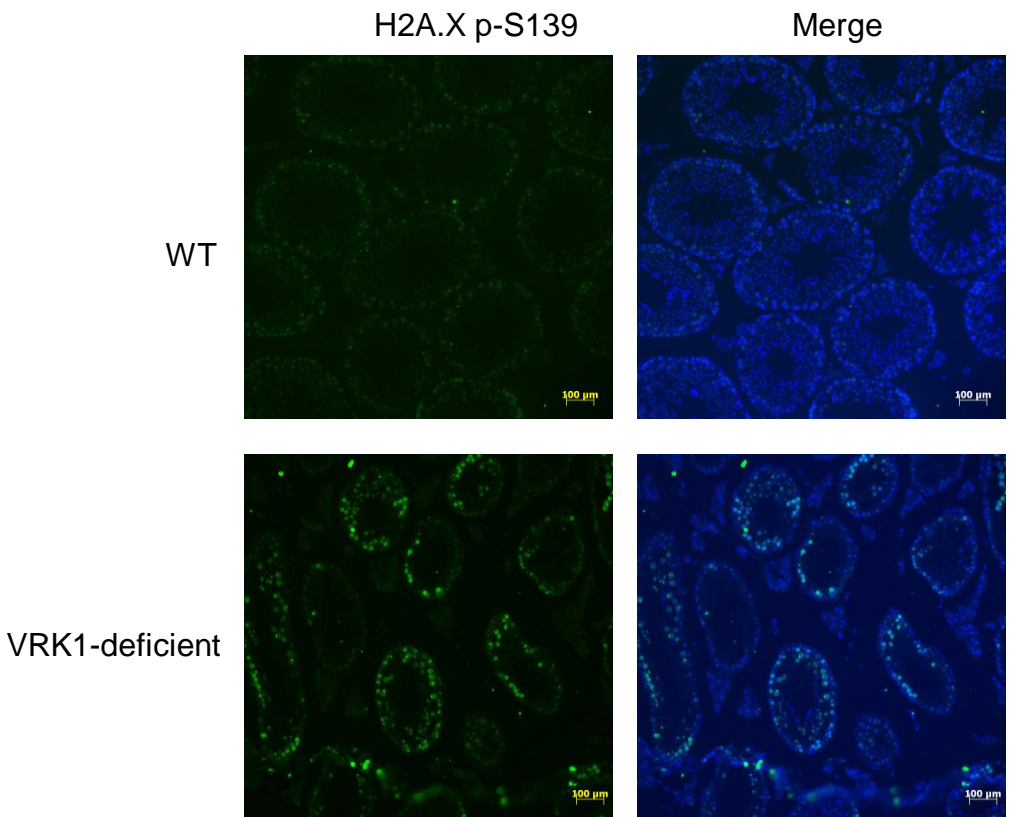

**Supplementary Figure 5. DNA-damage signaling activated in VRK1-deficient testes.** (A) Wild type (n=2) and VRK1-deficient testes (n=3) were analyzed by Western blot.  $\beta$ -tubulin is used as a loading control. (B) Testis sections from wild type and VRK1-deficient mice were stained with H2A.X p-Ser139 antibody. Scale bar=100  $\mu$ m.
